# Supplementary material for: Associations between IL-6 and Echo-Parameters in Patients with Early Onset Coronary Artery Disease
Source: PubMed Central journal article supplement (PMC6963263; doi:10.3390/diagnostics9040189), 2019-11-14
Supplement: diagnostics-09-00189-s001.pdf [file diagnostics-09-00189-s001.pdf]

**Table S1.** Spearman's rank correlation coefficient (Rs) and probability (p) value for serum IL-6 concentration and biochemical and clinical parameters in early onset CAD patients.

| Parameter                          | IL-6             |                 |
|------------------------------------|------------------|-----------------|
|                                    | Rs               | p-value         |
| Age of patients                    | -0.011220        | 0.915460        |
| Waist                              | 0.010406         | 0.923789        |
| Hip                                | -0.038176        | 0.725544        |
| WHR                                | 0.011717         | 0.914225        |
| Body weight                        | -0.020530        | 0.846838        |
| BMI                                | 0.088573         | 0.403775        |
| Systolic BP                        | -0.010310        | 0.923170        |
| Diastolic BP                       | 0.101771         | 0.339845        |
| MAP                                | 0.068154         | 0.523296        |
| HR                                 | -0.084947        | 0.450846        |
| Age of the first MI                | -0.017427        | 0.893059        |
| <b>Times since the onset of MI</b> | <b>0.252287</b>  | <b>0.044307</b> |
| <b>WBC</b>                         | <b>0.492151</b>  | <b>0.000001</b> |
| RBC                                | -0.117451        | 0.264846        |
| Hemoglobin                         | -0.100866        | 0.338723        |
| Hematocrit                         | 0.003569         | 0.973067        |
| MCV                                | 0.160129         | 0.127318        |
| MCH                                | -0.007994        | 0.939713        |
| <b>MCHC</b>                        | <b>-0.295951</b> | <b>0.004179</b> |
| RDW                                | 0.160498         | 0.128570        |
| %Neutrophils                       | 0.138923         | 0.186602        |
| %Lymphocytes                       | -0.187338        | 0.073746        |
| %Monocytes                         | -0.000613        | 0.995373        |
| %Eosinophils                       | -0.045754        | 0.664955        |
| %Basophils                         | -0.094071        | 0.372423        |
| Platelets                          | 0.182934         | 0.080913        |
| PDW                                | -0.053797        | 0.610528        |
| MPV                                | -0.084068        | 0.425600        |
| PCT                                | 0.155168         | 0.139694        |
| PLCR                               | -0.046963        | 0.658455        |
| <b>hsCRP</b>                       | <b>0.526116</b>  | <b>0.000000</b> |
| Glucose                            | -0.114907        | 0.270107        |
| Total cholesterol                  | 0.129366         | 0.213978        |
| LDL                                | 0.077411         | 0.458333        |
| HDL                                | -0.041502        | 0.691248        |
| Triacylglycerides                  | 0.186045         | 0.072598        |
| LPa                                | -0.097841        | 0.348158        |
| ApoB                               | 0.076316         | 0.464733        |
| ApoA1                              | -0.044487        | 0.670284        |
| ApoB/ApoA1                         | 0.130336         | 0.210537        |
| Atrial rate                        | 0.056227         | 0.602836        |
| Ventricular rate                   | 0.056227         | 0.602836        |
| LAD                                | 0.004660         | 0.965227        |
| LVESD                              | 0.111351         | 0.298865        |
| LVEDD                              | 0.022215         | 0.836295        |
| LVESV                              | 0.024295         | 0.823254        |

|                                 |                  |                 |
|---------------------------------|------------------|-----------------|
| LVEDV                           | -0.043735        | 0.685774        |
| LVEF                            | -0.177028        | 0.095083        |
| <b>LVFS</b>                     | <b>-0.335167</b> | <b>0.001324</b> |
| LVMI                            | 0.138107         | 0.210272        |
| PWD                             | -0.100752        | 0.347499        |
| E`                              | -0.015914        | 0.883688        |
| A`                              | -0.026208        | 0.812934        |
| S`                              | -0.167885        | 0.254035        |
| E`/A` ratio                     | 0.004883         | 0.964841        |
| E/A ratio                       | 0.161625         | 0.130234        |
| DT                              | -0.089404        | 0.404743        |
| IVRT                            | -0.178607        | 0.094003        |
| RVSP                            | 0.007777         | 0.945061        |
| <b>RVEDD</b>                    | <b>-0.210963</b> | <b>0.047203</b> |
| Right ventricular hypertrophy   | 0.011736         | 0.916658        |
| IVSD                            | -0.141706        | 0.185288        |
| <b>Ascending aorta diameter</b> | <b>-0.282342</b> | <b>0.007014</b> |
| IMC CCA left mean               | 0.022186         | 0.855344        |
| IMC CCA right mean              | -0.041853        | 0.732760        |
| IMC CCA mean                    | -0.031564        | 0.795333        |
| IMC ba left mean                | <b>-0.296014</b> | <b>0.015009</b> |
| IMC ba right mean               | -0.123406        | 0.319774        |
| IMC ba mean                     | -0.222608        | 0.070199        |
| PLA left mean                   | -0.165925        | 0.417891        |
| PLA length left                 | 0.221272         | 0.277338        |
| PLA density left                | 0.007870         | 0.969563        |
| PLA right mean                  | -0.115111        | 0.516815        |
| PLA length right                | 0.009169         | 0.958956        |
| PLA density right               | -0.017732        | 0.920716        |
| PLA mean                        | -0.095258        | 0.586216        |
| PLA length                      | 0.044033         | 0.790111        |
| PLA density                     | 0.030067         | 0.855819        |
| ABI left                        | -0.104511        | 0.396347        |
| ABI right                       | -0.122108        | 0.321206        |
| ABI mean                        | -0.122194        | 0.320864        |

ABI – ankle-brachial index, BMI – body mass index, BP – blood pressure, DT – E-wave deceleration time, HR – heart rate, IMC CCA – intima-media complex of common carotid arteries, IMC ba – intima-media complex of brachial arteries, IVRT – isovolumic relaxation time, IVSD – interventricular septum at end-diastole, LAD – left atrium diameter, LVEDD – left ventricular end-diastolic diameter, LVEDV – left ventricular end-diastolic volume, LVEF – left ventricular ejection fraction, LVESD – left ventricular end-systolic diameter, LVESV – left ventricular end-systolic volume, LVFS – left ventricular fractional shortening, LVMI – left ventricular mass index, MAP – mean arterial pressure, PLA – plaque of common carotid artery bifurcation, PWD – posterior wall thickness at end-diastole, RBC – red blood cells, RVEDD – right ventricular end-diastolic diameter, RVSP – right ventricular systolic pressure, WBC – white blood cells, WHR – waist-to-hip ratio.

**Table S2.** The associations between qualitative variables and serum IL-6 concentration in early onset CAD patients.

| Variable                           | IL-6     |
|------------------------------------|----------|
|                                    | p-value  |
| History of hypertension            |          |
| Yes vs. No                         | 0.828592 |
| Past MI                            |          |
| Yes vs. No                         | 0.509520 |
| Diastolic function                 |          |
| normal vs. pseudonormal + impaired | 0.697604 |
| pseudonormal vs. normal + impaired | 0.943436 |
| impaired vs. normal + pseudonormal | 0.790215 |
| ABI                                |          |
| <1.0 vs. ≥1.0                      | 0,152972 |
| IMC CCA                            |          |
| ≤ 0.9 vs. > 0.9                    | 0,459809 |
| IMC ba                             |          |
| ≤ 0.6 vs > 0.6                     | 0,207399 |
| Presence of PLA                    |          |
| Yes vs. No                         | 0,666665 |
| PLA length                         |          |
| ≤ 6.0 vs. > 6.0                    | 0,669043 |
| PLA density                        |          |
| ≤ 70 vs. > 70.0                    | 0,565681 |

IMC CCA – intima-media complex of common carotid arteries, IMC ba – intima-media complex of brachial arteries, MI – myocardial infarction, PLA – plaque of common carotid artery bifurcation.
